# Supplementary material
Source: Elsevier journal article supplement (https://www.sciencedirect.com/science/article/pii/S0021755718304194)
Supplement: mmc1 [file S0021755718304194:mmc1.docx]

Supplementary File 1: Search strategy.

| **Database** | **Terms used** |
| --- | --- |
| MEDLINE | “Sedentary behavior” OR sitting OR "sitting time" OR lying OR seated OR “TV view” OR “television viewing” OR “computer use” OR sedentary OR “activity restriction” OR “sedentary lifestyle” OR inactivity OR “video games” OR television OR “screen time” OR "screen viewing" OR “tv watch” AND Prevalence [Mesh] OR Prevalence AND Adolescents OR teen OR teenager OR youth OR youths OR adolescence OR boys OR girls AND Brazil [Mesh] OR Brazila OR Brazil OR “Minas Gerais” OR “São Paulo” OR “Espírito Santo” OR “Rio de Janeiro” OR Bahia OR Pará OR “Mato Grosso” OR “Mato Grosso do Sul” OR Goiás OR “Rio Grande do Sul” OR Ceará OR Pernanbuco OR “Santa Catarina” OR Amazonas OR Maranhão OR Tocantins OR Piauí OR Rondônia OR Roraima OR Paraná OR Acre OR Amapá OR Paraíba OR “Rio Grande do Norte” OR Alagoas OR Sergipe OR “Distrito Federal” |
| SciELO | English  ("sedentary behavior" ) AND (adolescents) AND (prevalence)  Portuguese  ("comportamento sedentário") AND (adolescentes) AND (prevalência) |
| LILACS | English  [tw:("sedentary behavior")] AND [tw:(adolescents)] AND [tw:(prevalence)]  Portuguese  Comportamento sedentário AND adolescente AND prevalência |
| Adolec | English  [tw:("sedentary behavior" )] AND [tw:(adolescents)] AND [tw:(prevalence)]  Portuguese  Comportamento sedentário AND adolescente AND prevalência |
