# Supplementary material
Source: Elsevier journal article supplement (https://www.sciencedirect.com/science/article/pii/S0021755718304194)
Supplement: mmc2 [file S0021755718304194:mmc2.xlsx]

## Sheet: Hoja1
Supplementary File 2. Risk of bias summary of the included studies.
	External Validity					Internal Validity
Study, year	Target population close representation of national population	Sample frame true representation of target population	Random selection used	Minimal risk of no-response bias	Data collected from subjects (not a proxy)	Acceptable case definition	Reliable and validity measurement of parameter of interest	Consistent mode of data collection	Appropriate prevalence period	Appropriate numerators and denominators	Overall risk
Rivera et al., 2010	Low risk	Low risk	Low risk	Low risk	Low risk	Low risk	Low risk	Low risk	Low risk	Low risk	Low risk
Tenório et al., 2010	Low risk	Low risk	Low risk	Low risk	Low risk	Low risk	Low risk	Low risk	Low risk	Low risk	Low risk
Silva et al., 2014	Low risk	Low risk	Low risk	High risk	Low risk	Low risk	High risk	Low risk	Low risk	Low risk	Moderate risk
de Lucena et al., 2015	Low risk	Low risk	Low risk	Low risk	Low risk	Low risk	Low risk	Low risk	Low risk	Low risk	Low risk
Silva et al., 2016	Low risk	Low risk	Low risk	Low risk	Low risk	Low risk	Low risk	Low risk	Low risk	Low risk	Low risk
Wendpap et al., 2014	High risk	High risk	High risk	Low risk	Low risk	Low risk	Low risk	Low risk	Low risk	Low risk	High risk
Ceschini et al., 2009	Low risk	Low risk	Low risk	High risk	Low risk	Low risk	Low risk	Low risk	Low risk	Low risk	Moderate risk
de Vitta et al., 2011	Low risk	Low risk	High risk	Low risk	Low risk	Low risk	High risk	Low risk	Low risk	Low risk	Moderate risk
de Vitta et al., 2014	Low risk	Low risk	Low risk	Low risk	Low risk	Low risk	High risk	Low risk	Low risk	Low risk	Low risk
de Prado Junior et al., 2015	Low risk	High risk	High risk	High risk	Low risk	Low risk	High risk	Low risk	Low risk	Low risk	High risk
Fernandes et al., 2015	Low risk	Low risk	High risk	Low risk	Low risk	Low risk	High risk	Low risk	Low risk	Low risk	Moderate risk
Dutra et al., 2006	Low risk	Low risk	Low risk	Low risk	Low risk	Low risk	High risk	Low risk	Low risk	Low risk	Low risk
Silva et al., 2008	Low risk	Low risk	Low risk	Low risk	Low risk	Low risk	Low risk	Low risk	Low risk	Low risk	Low risk
Campagnolo et al., 2007	Low risk	Low risk	Low risk	High risk	Low risk	Low risk	Low risk	Low risk	Low risk	Low risk	Moderate risk
Dumith et al., 2010	Low risk	Low risk	Low risk	Low risk	Low risk	Low risk	Low risk	Low risk	Low risk	Low risk	Low risk
Silva et al., 2011	Low risk	Low risk	Low risk	Low risk	Low risk	Low risk	High risk	Low risk	Low risk	Low risk	Low risk
Filho et al., 2012	Low risk	Low risk	Low risk	Low risk	Low risk	Low risk	Low risk	Low risk	Low risk	Low risk	Low risk
Rech et al., 2013	Low risk	Low risk	Low risk	Low risk	Low risk	Low risk	High risk	Low risk	Low risk	Low risk	Low risk
Silva et al., 2014a	Low risk	Low risk	Low risk	Low risk	Low risk	Low risk	Low risk	Low risk	Low risk	Low risk	Low risk
Coledam et al., 2014	Low risk	Low risk	Low risk	Low risk	Low risk	Low risk	Low risk	Low risk	Low risk	Low risk	Low risk
Cristofaro et al., 2015	Low risk	High risk	High risk	High risk	Low risk	Low risk	Low risk	Low risk	Low risk	Low risk	High risk
Castro et al., 2016	Low risk	Low risk	Low risk	Low risk	Low risk	Low risk	High risk	Low risk	Low risk	Low risk	Low risk
Golcalves et al., 2016	Low risk	Low risk	Low risk	Low risk	Low risk	Low risk	Low risk	Low risk	Low risk	Low risk	Low risk
Bacil et al., 2016	Low risk	Low risk	Low risk	High risk	Low risk	Low risk	Low risk	Low risk	Low risk	Low risk	Moderate risk
Ferreira et al., 2016	Low risk	Low risk	Low risk	High risk	Low risk	Low risk	Low risk	Low risk	Low risk	Low risk	Moderate risk
Camelo et al., 2012	Low risk	Low risk	Low risk	Low risk	Low risk	Low risk	High risk	Low risk	Low risk	Low risk	Low risk
Rezende et al., 2014	Low risk	Low risk	Low risk	Low risk	Low risk	Low risk	High risk	Low risk	Low risk	Low risk	Low risk
Oliveira et al., 2016	Low risk	Low risk	Low risk	High risk	Low risk	Low risk	High risk	Low risk	Low risk	Low risk	Moderate risk
a Data from TV viewing and total screen time in 2001 and 2011.
